# Supplementary material for: Naphthalimide-based optical turn-on sensor for monosaccharide recognition using boronic acid receptor
Source: Royal Society of Chemistry journal article supplement (doi:10.1039/c9ra01757g), 2019-01-01
Supplement: c9ra01757g1.pdf [file c9ra01757g1.pdf]

## **Supporting Information**

### **Naphthalimide-based optical turn-on sensor for monosaccharide recognition using boronic acid receptor**

Sanaz Seraj <sup>a</sup>, Shohre Rouhani<sup>\*a, b</sup>, Farnoush Faridbod <sup>c</sup>

*<sup>a</sup>Department of Organic Colorants, Institute for Color Science and Technology, Tehran, Iran*

*<sup>b</sup> Center of excellence for Color Science and Technology(CECST), Institute for Color Science and Technology, Tehran, Iran*

*<sup>c</sup> Center of Excellence in Electrochemistry, School of Chemistry, College of Science, University of Tehran, Tehran, Iran*

# **CONTENT**

**S1. General method**

**S2. Synthesis procedure**

**S3. Additional Tables**

## S1.General

The absorption of the synthesized dye and GO in PBS solution was measured using CECIL-CE9200 spectrophotometer. Fluorescence emission changes were examined by spectral Perkin-Elmer LS55 fluorescence spectrophotometer. Functional groups were evaluated using FTIR technique by SPECTRUM ONE spectrometer. <sup>1</sup>H NMR and <sup>13</sup>C NMR spectra were measured by Bruker DRX AVANCE NMR spectrophotometer at two frequencies 500 MHz and 125 MHz, respectively in DMSO.

## S2.Synthesis

The intermediate 3 was synthesized using acenaphthene according to the references mentioned [1,2,3]. Compound 4 (NO) was synthesized according to previously reported procedure [4]. 4-Bromo-1,8-naphthalic anhydride (36 mmol) was reacted with o-phenylenediamine (55 mmol) in glacial acetic acid (120 ml) for 7h under reflux and then washed with water to obtain the desired product. After recrystallization with acetic acid, needle yellow powders were obtained, yield 73%; m.p. 215-216 °C, FTIR (KBr) cm<sup>-1</sup>:1691, 1390, 764.

Compound 5 (NOP): Compound 4 (10 mmol), piperazine (80 mmol), hydrated CuSO<sub>4</sub> (1.6 mmol) and 2-methoxyethanol (100 ml) were reacted under reflux and nitrogen gas for 7h. After raw material exhausted the resulting mixture was poured by water. Crystallized from ethanol then purified on silica gel yielded the orange needles (20%). m.p.235-236 °C, FTIR (KBr) cm<sup>-1</sup>: 3431, 2346, 1676, 1362. <sup>1</sup>H NMR (DMSO, 500MHz) δppm: 8.7-7.44 (m,9H), 3.31 (t, j=5 ,4H), 2.46 (t, j=5 ,4H). <sup>13</sup>C NMR (DMSO, 125 MHz) : 156.7, 154.9, 141.4, 138.8, 134.6, 133.5, 133.3, 131.2, 130.0, 128.2, 123.4, 123.3,123.0, 115.2, 114.1, 49.7, 42.8. Elemental analysis: Anal. Calcd. (%) for: C<sub>22</sub>H<sub>18</sub>N<sub>4</sub>O: C, 87.42; H, 5.96; N, 18.54. Found (%): C, 87.48; H, 5.88; N, 18.42.

Compound 6 (NOPB): The intermediate 5 (0.47 mmol) was reacted with (2-bromo methyl phenyl) boronic acid pinacol ester (0.64 mmol) under reflux for 7h. The solvent used in this part of synthesis was a 40 ml mixed solution of THF: CH<sub>3</sub>OH (v:v=1:1). During the reaction, 2ml of tri ethylamine was added dropwise to the reaction mixture. After tracing reaction with TLC, the extra solvent

was removed from the system under reduced pressure and the resulting product was purified on silica gel using [5:1 CH<sub>2</sub>Cl<sub>2</sub>: CH<sub>3</sub>OH] to obtain orange powders (0.064g, 25%). FTIR (KBr) cm<sup>-1</sup>: 3430, 2326, 1656, 1335, 1094. <sup>1</sup>H NMR (DMSO, 500MHz) δppm: 8.45(d, j=25, 1H), 8.36(d, j= 25, 1H), 8.3(d, j=25, 1H), 7.26-8.25 (m, 10H), 3.83 (s ,2H), 3.4 (t, j=5 ,4H), 2.5 (t, j=5,4H). <sup>13</sup>C NMR (DMSO, 125 MHz) δppm: 157.2, 155.5, 146.5, 135.3, 134.3, 134.1, 133.9, 133.3, 133.1, 132, 131.9, 127.2, 126.6, 126.1, 125.7, 125.1, 122.8, 122, 116, 115.7, 115.5, 62.2, 53.7, 51.6. Elemental analysis: Anal. Calcd. (%) for: C<sub>29</sub>H<sub>25</sub>N<sub>4</sub>O<sub>3</sub>B: C, 71.46; H, 5.13; N, 11.5. Found (%): C, 71.44; H, 5.15; N, 11.7.

### S3. Additional Tables

**Table S3-1** The association constants (K<sub>as</sub>) between NOPB and NOPB-GO with fructose and their detection limits (LOD), quantum yield in the absence and presence of fructose

| Probe                   | K <sub>as</sub> (M <sup>-1</sup> ) | LOD (mM) | ϕ <sub>fa</sub> | FE |
|-------------------------|------------------------------------|----------|-----------------|----|
| <b>NOPB-Fructose</b>    | 94.33                              | 0.040    | 0.157           | 3  |
| <b>NOPB Blank</b>       | -                                  | -        | 0.052           | -  |
| <b>NOPB-GO-Fructose</b> | 196.07                             | 0.023    | 0.009           | 15 |
| <b>NOPB-GO</b>          | -                                  | -        | 0.0006          | -  |

<sup>a</sup> Fluorescein (ϕ =0.95 in ethanol) was used as the reference, [NOPB] =5×10<sup>-5</sup> M, ,[NOPB-GO]= 5×10<sup>-5</sup> M with 40 µg/mL GO , [Fructose] = 100 mM, 50 mM PBS, pH 7.4.<sup>b</sup> Fluorescent enhancement (FE) is the ratio of quantum yield with sugar and that without sugar.

**Table S3-2** Naphthalimide fluorescence probes for fructose detection

| Structure                                                                           | Stock Shift (nm) | Mechanism of detection   | pH  | Association constant ( $K_a(M^{-1})$ ) | Linear range (mM) | $\Delta I_f$ | LOD(mM) | year | Ref.          |
|-------------------------------------------------------------------------------------|------------------|--------------------------|-----|----------------------------------------|-------------------|--------------|---------|------|---------------|
| 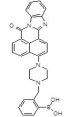   | 50               | Flourescence enhancement | 7.4 | 94.33                                  | 0.13-50           | 6.5          | 0.040   | 2019 | Present study |
|    | 50               | Flourescence enhancement | 7.5 | 196.07                                 | 0.07-30           | 35           | 0.023   | 2019 | Present study |
|    | 120              | Flourescence enhancement | 7.5 | 170                                    | 1-20              | 2            | 0.1mM   | 2006 | [5]           |
|    | 77               | Flourescence enhancement | 7.4 | 57                                     | N R               | 2.5          | 2-2.3 M | 2007 | [6]           |
|    | 77               | Flourescence enhancement | 7.4 | 28                                     | N R               | 2.5          | -       | 2008 | [7]           |
|   | 85               | Flourescence enhancement | 9   | -N R                                   | 0-50mM            | 2.8          | 2.7     | 2014 | [8]           |
|  | 130              | Flourescence enhancement | 7.4 | 75.8                                   | 0-2000            | 50           | 0.045   | 2015 | [9]           |

NR=no report

## References

- [1] A. M. Brouwer, *Pure Appl. Chem.*, 2011, 83, 2213
- [2] M.Verma, V.Luxami, K.Paul, *RSC Adv.*, 2015, 5, 41803.
- [3] W.Jiang, Y.Sun, X.Wang, W.Xu, *Dyes Pigm.*, 2008, 77, 125.
- [4] X.Qian, Z.Zhu, *Dyes Pigm.*, 1989, 11, 13.
- [5] S.Trupp, A.Schweitzer, J.Mohr, *Org.Biomol.Chem.*, 2006, **4**, 2965.
- [6] J. Wang, S. Jin, S. Akay, B. Wang, *Eur. J. Org. Chem.*, 2007, 2091.
- [7] S. Jin, J. Wang, M. Li, B. Wang, *Chem. Eur. J.*, 2008, 14, 2795.
- [8] X.Sun, B.Zhu, D.K.J.Ji, Q.Chen, X.P.He, G.R.Chen, T.D.James, *Appl.Mater.Interfaces.*, 2014, **6**, 10078.
- [9] H.Chen, L.Li, H.Guo, X.Wang, W.Qin, *RSC Adv.*, 2015, **5**, 13805.
